# Supplementary material
Source: Royal Society of Chemistry journal article supplement (https://www.rsc.org/suppdata/nj/1999/695/900564a.doc)
Supplement: Supplementary file 1 [file 900564a.doc]

**Electronic Supplementary Information**

**Crystal supramolecular motifs: two-dimensional grids of terpy embraces in [ML2]z complexes (L = terpy or aromatic–N3–tridentate ligand)**

*Marcia L. Scudder, Harold A. Goodwin and Ian G. Dance*

School of Chemistry, University of New South Wales, Sydney 2052.

**Crystallographic details for compounds which manifest the two-dimensional terpy embrace net, and for exceptions**

Table S1 lists all of the [M(terpy)2]2+ and [M(terpy)2]3+ crystalline compounds found in the Cambridge Structural Database (October, 1998), plus two of our recently published structures.

The lattice of highest symmetry occurs in [Co(terpy)2](I)2.2H2O [CASXID] which crystallises in space group P42/n and exhibits the terpy 2D net. The Co atom lies on a 4bar site, and the two sides of the layer are identical. Sections of this structure are portrayed in Figs 2 and 4 of the full paper, while Fig S1 shows the locations of the I– anions and solvent H2O inside the grooves of the layer.

A variation of this crystal packing of layers occurs in [Cu(terpy)2](PF6)2 [BEJPUB] which crystallises without solvent. The space group is P–421c, with cell dimensions (9 x 9 x 20Å) similar to those of the P42/n cell of [Co(terpy)2](I)2.2H2O described above. Again the metal atom site has 4bar symmetry. While the ligand planes are parallel to the tetragonal *c* axis and both sides of the layer are identical, adjacent layers are rotated by about 45° about *c*. A view of two layers down *c* is shown in Fig 5 (full paper), to illustrate the rotation of adjacent layers in contrast to the arrangement shown in Fig 4 (a) (full paper). The position of the 4' H atom of each ligand in the gap at the centre of a cycle of four complexes in adjacent layers is retained in all structures. An interesting subtlety occurs in the crystal structure of the nickel analogue, [Ni(terpy)2](PF6)2 [BIKJUA], also solvent free, which crystallises instead in the space group P212121 with *a* and *b* values similar to those of the tetragonal cell for BEJPUB, but *c*, the axis perpendicular to the layer, is doubled. In BIKJUA both ligands are tilted slightly from vertical, and the two sides of the layer are not identical, but once again there is a mutual rotation of ligand planes in adjacent layers.

There is a group of isostructural compounds which crystallise with layers of terpy embraces in the related tetragonal space group I41/a. This group (see Table S1), includes the ClO4– or NO3– salts of [M(terpy)2]2+ M = Co, Cu, Mg, Ru, which crystallise with varying amounts of water: only [Cu(terpy)2][NO3]2 [TERPYC01] contains no water. This unit cell is obtained from the P42/n cell by a doubling of *c* and a 45° rotation about *c* (doubling the *ab* area). The space group change (manifest in weak diffraction intensities for *l* odd) results from a long range ordering of the anions and solvent. The metal atoms occupy two-fold sites. The ligand planes are parallel to the *c* axis but are not necessarily exactly orthogonal. The two sides of the layers are identical, and contiguous molecules in adjacent layers have parallel terpy ligand planes. Disorder of both the anion and solvent is common, with only [Mg(terpy)2][ClO4]2.(H2O)0.5 [KUDCER] and [Cu(terpy)2][NO3]2 [TERPYC01] having no reported disorder.

There are further subtleties in the details of the packing of the layers. The nickel and iron compounds [M(terpy)2](ClO4)2.H2O [M = Fe, DANMOU and M = Ni, ZARNIP] are isostructural but crystallise with lower symmetry, P21 with a cell similar to the primitive tetragonal cell of CASXID and BEJPUB (see Table S1). The structural details are very similar to those described above for [Ni(terpy)2] (PF6)2, in that the ligands are tilted slightly from vertical, the two sides of the layer are not identical and adjacent layers are mutually rotated. Why these compounds did not crystallise with one of the above lattices is not yet understood, but the fact remains that the two-dimensional net of terpy embraces persists and that all twelve aryl•••aryl interactions are present. Fig S2 contrasts the layer stacking and anion locations in the crystal structures CAPSAN of [Co(terpy)2](ClO4)2 1.3H2O and DANMOU of [Fe(terpy)2](ClO4)2.H2O, in which the ligand planes in alternate layers are parallel and rotated respectively.

In a further twist to the story, [Os(terpy)2]2+ crystallised with ClO4– and water is in space group P21/n with a cell in which *c* is doubled relative to the preceding structures. Once again, the classic layer structure persists. Water is present on one side and is hydrogen bound to the anions, but not on the other. It is notable that crystal structures of [M(terpy)2]2+ complexes of each metal of a triad (M = Fe, Ru, Os) have been determined, each with the ClO4– anion and each including water. The three crystal structures have different space groups (Fe, P21; Ru, I41/a; Os, P21/n) but the layer structure is present in all three.

There are examples [M(terpy)2]2+ compounds with other anion and solvent combinations. Most of these crystallise in space group P–1 and in the case of [Hg(terpy)2](CF3SO3)2(acetone)0.5 [ZUWPEM] there are two complexes in the asymmetric unit. Apart from this mercury complex, the others are close to isomorphous, with a unit cell approximately 20Å x 9Å x 9Å, similar in size to the primitive tetragonal cells (see Table S1). In all these instances the packing is similar to that for the P42/n lattice, in that ligands in adjacent layers are parallel, but there is distortion of the ligands, both in planarity and in their orientation with respect to the layer direction. The layer sides are different, but overall the basic packing motif is still present with the anions and solvent molecules being located in the layer grooves. An interesting example is [Mn(terpy)2]2+ with the anion I3– [SIWFIN]. On one surface of the layer (A) the anion is wedged in the groove and is parallel to the ligand plane on that side. In contrast, on the other side of the layer (B) the I3– axis is orthogonal to the ligand plane and uses 6(I•••Ar) interactions. There are two different interfaces between layers, A-A and B-B, illustrated in Fig S3 (a) and (b) respectively. The A-A interlayer arrangement is made up of infinite ribbons of I3– ions with the closest contact between anions being 3.84Å (I••I, end to end) between ribbons. At the B–B interface there are pairs of I3– ions which are 4.07Å apart. Many of these I••I interactions are analogous to those which occur in polyiodide lattices templated by metal complexes.

In crystalline [Hg(terpy)2][F3CSO3]2.(acetone)0.5 [ZUWPEM], the layer structure is maintained but the ligand planes are substantially tilted from being orthogonal to the plane. In addition, the ligands protruding from the layer are not all parallel, a feature which is similar to a different cation with F3CSO3– [PAFZIF] which is discussed below.

**Geometric variables of the [M(terpy)2]2+ layer motif.**

The [M(terpy)2]2+ layer motif occurs in a variety of crystal space groups, which reflect its different geomeric characteristics, listed in Table S2. The arrangement of metal atoms in the layers can be exactly planar, and it is so in all cases except for those structures in space group I41/a, when the deviation is usually less than 0.25Å, but in the case of TERPYCO01 the Co atoms are just over 1Å from their mean plane. While there is no crystallographic requirement for each ligands to be exactly planar, in most instances they are nearly so, and in the tetragaonal structures this plane is very close to orthogonal to the plane of the layer. The two ligand planes on a single metal centre are exactly mutually orthogonal only when the space group is P42/n or P–421c, although in all other cases there is little deviation from orthogonality, with the angles between the normals to the ligand planes generally being in the range 85-90°. The ligand planes are exactly orthogonal to the layer motif when the space group is tetragonal. In the other cases, there can be a significant tilt of one, or both of the ligand planes from the layer direction: this tilt can be by up to 25°. Adjacent layers are always offset in order to alleviate interaction between the hydrogen atoms in the 4' position. For those structures in space groups P–421c, P212121 or P21, adjacent layers are also mutually rotated by about 45°. The nature of the junction between adjacent layers depends on the space group symmetry. The two surfaces of a layer can be identical, as in the tetragonal structures, or different as for all other structure types.

**Crystals containing [M(L)2]2+, where L is not terpyridine**

Figure S4 shows two views of the NH•••O(EtOH)•••O(triflate)•••HN hydrogen bonding in [Fe(Lc)2][F3CSO3]2.(EtOH)1.5 [PAFZIF].

Figure S5 shows the crystal packing of [Fe(Lf)2](BF4)2 (H2O)3 [WEYWAY], which is the single exceptional structure in which virtually all aryl•••aryl interactions have been disrupted, and the [Fe(Lf)2]2+ complexes do not form terpy embraces.

Lf

**Fig S1.** Locations of the I– counterions and water molecules in the grooves of the layers of terpy embraces in [Co(terpy)2](I)2.2H2O [CASXID]. I– is speckled, O is striped. The water molecules are disordered over the oxygen sites marked. The shortest I•••C contact in the groove is 4.1Å: there is hydrogen-bonding, O•••I = 3.34Å.

**Fig S2** Space-filling comparative side views of three layers of CAPSAN ([Co(terpy)2](ClO4)2 1.3H2O, left) and DANMOU ([Fe(terpy)2](ClO4)2.H2O, right): C green or purple; Cl orange; O red. Note that the green layers of cations are the same in both structures, but the purple layers are different. This view shows the degree of interpenetration of the layers, and the locations of the ClO4– and H2O at the interface.

**Fig S3** The different interfaces between terpy embrace layers in crystalline [Mn(terpy)2] (I3)2 [SIWFIN]. Both views are normal to the layers, and include I3– ions from both layers but terpy complexes only from the lower layer. (a) Ribbons I3– at the A–A interface. (b) The B–B interface.

**Fig S4** Two views of the NH•••O(EtOH)•••O(triflate)•••HN hydrogen bonding in [Fe(Lc)2](F3CSO3)2.(EtOH)1.5 [PAFZIF]. The F3CSO3– and EtOH atoms are enlarged for emphasis: O is heavily striped, F is lightly striped, S is stippled; H atoms omitted; hydrogen bond connections are black lines.

**Fig S5** Part of the crystal structure of [Fe(Lf)2](BF4)2 (H2O)3 [WEYWAY], which does not contain the terpy embraces.

**References**

1 I. G. Dance, in *The Crystal as a Supramolecular Entity*, eds. G. R. Desiraju, John Wiley, New York, 1996, p. 137-233

2 I. G. Dance and M. L. Scudder, *J. Chem. Soc., Dalton Trans.*, 1996, 3755.

3 I. G. Dance and M. L. Scudder, *Chem. Eur. J.*, 1996, **2**, 481.

4 I. Dance and M. Scudder, *J. Chem. Soc., Chem. Commun.*, 1995, 1039.

5 I. Dance and M. Scudder, *New J. Chem.*, 1998, 481-492.

6 M. Scudder and I. Dance, *J. Chem. Soc., Dalton Trans.*, 1998, 329-344.

7 I. Dance and M. Scudder, *Polyhedron*, 1997, **16**, 3545-3548.

8 C. Hasselgren, P. A. W. Dean, M. L. Scudder, D. C. Craig and I. G. Dance, *J. Chem. Soc., Dalton Trans.*, 1997, 2019-2027.

9 M. Scudder and I. Dance, *J. Chem. Soc., Dalton Trans.*, 1998, 3167-3176.

10 M. Scudder and I. Dance, *J. Chem. Soc., Dalton Trans.*, 1998, 3155-3166.

11 I. Dance and M. Scudder, *J. Chem. Soc., Dalton Trans.*, 1998, 1341-1350.

12 B. N. Figgis, E. S. Kucharski and A. H. White, *Aust. J. Chem.*, 1983, **36**, 1537-1561.

13 P. N. W. Baxter, J. M. Lehn, J. Fischer and M. T. Youinou, *Angew. Chem. Int. Ed. Engl.*, 1994, **33**, 2284.

14 P. N. W. Baxter, J. M. Lehn, B. O. Kneisel and D. Fenske, *Chem. Commun.*, 1997, 2231-2232.

15 D. M. Bassani, J. M. Lehn, K. Fromm and D. Fenske, *Angew. Chem. Int. Ed. Engl.*, 1998, **37**, 2364-2367.

16 G. S. Hanan, D. Volkmer, U. S. Schubert, J. M. Lehn, G. Baum and D. Fenske, *Angew. Chem. Int. Ed. Engl.*, 1997, **36**, 1842-1844.

17 D. C. Craig, M. L. Scudder, W.-A. McHale and H. A. Goodwin, *Aust. J. Chem.*, 1998, **51**, 1131.

18 A. J. Blake, F. A. Devillanova, R. O. Gould, W.-S. Li, V. Lippolis, S. Parsons, C. Radek and M. Schroder, *Chem. Soc. Rev.*, 1998, **27**, 195-205.

19 K. H. Sugiyarto, D. C. Craig, A. D. Rae and H. A. Goodwin, *Aust. J. Chem.*, 1994, **47**, 869-890.

20 K. H. Sugiyarto, D. C. Craig, M. L. Scudder and H. A. Goodwin, *Unpublished*, 1998.

21 G. Sproul and G. D. Stucky, *Inorg. Chem.*, 1973, **12**, 2898-2901.

22 A. K. Rappe and W. A. Goddard, *J. Phys. Chem.*, 1991, **95**, 3358-3363.

23 B. F. Ali, I. G. Dance and M. L. Scudder, 1999, in preparation.

24 P. Gutlich, J. Jung and H. A. Goodwin, in *Molecular Magnetism: From Molecular Assemblies to the Devices*, eds. E. Coronado, P. Delhaes, D. Gatteschi, and J. S. Miller, Kluwer Academic Publishers, P.O. Box 17, NL–3300 AA Dordecht, Dordrecht, 1996, p. 327–378

25 Z. J. Zhong, J.-Q. Tao, Z. Yu, C.-Y. Dun, Y.-J. Liu and X.-Z. You, *J. Chem. Soc., Dalton Trans.*, 1998, 327.

26 J.-F. Letard, P. Guionneau, L. Rabardel, J. A. K. Howard, A. E. Goeta, D. Chasseau and O. Kahn, *Inorg. Chem.*, 1998, **37**, 4432.

27 K. H. Sugiyarto, K. Weitzner, D. C. Craig and H. A. Goodwin, *Aust. J. Chem.*, 1997, **50**, 869-873.

ACPXNI G. Sproul and G. D. Stucky, *Inorg. Chem.*, 1973, **12**, 2898.

BEJPUB M. I. Arriortua, T. Rojo, J. M. Amigo, G. Germain and J. P. Declercq, *Acta Crystallogr., Sect. B*, 1982, **38**, 1323.

BIKJUA M. I. Arriortua, T. Rojo, J. M. Amigo, G. Germain and J. P. Declercq, *Bull. Soc. Chim. Belg.*, 1982, **91**, 337.

BIYJOI W. Henke and S. Kremer, *Inorg. Chim. Acta*, 1982, **65**, L115.

CAPRIU B. N. Figgis, E. S. Kucharski and A. H. White, *Aust. J. Chem.*, 1983, **36**, 1563.

CAPSAN B. N. Figgis, E. S. Kucharski, and A. H. White, *Aust. J. Chem.*, 1983, **36**, 1537.

CASXID, CASXID01 B. N. Figgis, E. S. Kucharski and A. H. White, *Aust. J. Chem.*, 1983, **36**, 1527.

COLJAO A. T. Baker, H. A. Goodwin, A. D. Rae, *Aust. J. Chem.*, 1984, **37**, 443.

DANMOU A. T. Baker and H. A. Goodwin, *Aust. J. Chem.*, 1985, **38**, 207.

DIXDIX A. T. Baker, H. A. Goodwin, *Aust. J. Chem.*, 1986, **39**, 209.

FADJAW F. Takusagawa, P. G. Yohannes and K. B. Mertes, *Inorg. Chim. Acta*, 1986, **114**, 165.

KIJZUY D. Marcos, J. -V. Folgado, D. Beltran-Porter, M. T. P. Gambardella, S. H. Pulcinelli, R. H. De Almeida-Santos, *Polyhedron*, 1990, **9**, 2699.

KUDCER E. C. Constable, J. Healy and M. G. B. Drew, *Polyhedron*, 1991, **10**, 1883.

NACPOW A. L. Rheingold, M. B. Allen, Private Communication, 1996

NAPYFE10 P. Singh, A. Clearfield and I. Bernal, J. Coord. Chem., 1971, 1, 29.

PAFZIF S. Ruttimann, C. M. Moreau, A. F. Williams, G. Bernardinelli and A. W. Addison, *Polyhedron*, 1992, **11**, 635.

RIZSOI, RIZSUO B. J. Childs, J. M. Cadogan, D. C. Craig, M. L. Scudder and H. A. Goodwin, *Aust. J. Chem.,* 1997, **50**, 129.

SIBWEF J. -V. Folgado, W. Henke, R. Allmann, H. Stratemeier, D. Beltran-Porter, T. Rojo and D. Reinen, *Inorg. Chem.*, 1990, **29**, 2035.

SIWFIN R. Bhula, D. C. Weatherburn, *Aust. J. Chem.*, 1991, **44**, 303.

TAQRUY A. F. Waters and A. H. White, *Aust. J. Chem.*, 1996, **49**, 147.

TERPCO, TERPCO01 C. L. Raston and A. H. White, *J. Chem. Soc., Dalton Trans.*, 1976, 7.

TERPCR W. A. Wickramasinghe, P. H. Bird, M. A. Jamieson and N. Serpone, *J. Chem. Soc., Chem. Comm.*, 1979, 798.

TERPYC01 R. Allmann, W. Henke and D. Reinen, *Inorg. Chem.*, 1978, **17**, 378.

TPYCOB E. N. Maslen, C. L. Raston and A. H. White, *J. Chem. Soc., Dalton Trans.*, 1974, 1803.

WEYVUR, WEYWAY K. H. Sugiyarto, D. C. Craig, A. D. Rae and H. A. Goodwin, *Aust. J. Chem.*, 1994, **47**, 869.

WEYWEC B. J. Childs, D. C. Craig, K. A. Ross, M. L. Scudder and H. A. Goodwin, *Aust. J. Chem.*, 1994, **47**, 891.

ZARNIP A. T. Baker, D. C. Craig and A. D. Rae, *Aust. J. Chem.*, 1995, **48**, 1373.

ZIMBUS P. Laine, A. Gourdon and J. -P. Launay, *Inorg. Chem.*, 1995, **34**, 5156.

ZUMXUA D. A. Bardwell, A. M. W. C. Thompson, J. C. Jeffery, J. A. McCleverty and M. D. Ward, *J. Chem. Soc., Dalton Trans.*, 1996, 873.

ZUWPEM D. Matkovic-Calogovic, Z. Popovic and B. Korpar-Colig, *J. Chem. Cryst.*, 1995, **25**, 453.

**Table S1**  Crystals containing [M(terpy)2]z+, z = 2, 3

| refcode | metal | anions and solventa | space group | cell dimensions |
| --- | --- | --- | --- | --- |
| CASXID01b | Co(II) | (I)2.(H2O)2a | P42/n | 8.9 19.4 |
| BEJPUB | Cu(II) | (PF6)2 | P–421c | 8.9 20.6 |
| BIKJUA | Ni(II) | (PF6)2 | P212121 | 8.9 9.0 45.4 |
| CAPSAN | Co(II) | (ClO4)2a.(H2O)1.3a | I41/a | 12.5 40.4 |
| BIYJOIc | Co(II) | (ClO4)2a.(H2O)0.5a | I41/a | 12.5 40.3 |
| FADJAW | Co(II) | (NO3)2a.(H2O)2 | I41/a | 12.4 38.9 |
| KUDCER | Mg(II) | (ClO4)2.(H2O)0.5 | I41/a | 12.5 40.5 |
| TERPYC01 | Cu(II) | (NO3)2 | I41/a | 12.5 36.3 |
| reference 17 | Ru(II) | (ClO4)2a.(H2O)1.1a | I41/a | 12.5 40.2 |
| DANMOU | Fe(II) | (ClO4)2a.H2O | P21 | 8.8 8.9 20.0 101 |
| ZARNIP | Ni(II) | (ClO4)2a.H2O | P21 | 8.8 8.9 20.1 99 |
| reference 17 | Os(II) | (ClO4)2a (H2O)0.5 | P21/n | 8.8 8.9 39.2 94 |
| SIBWEF | Cu(II) | (Br)2a.(H2O)3a | P–1 | 20.0 9.7 8.5  96 94 95 |
| TPYCOB | Co(II) | (Br)2a.(H2O)3a | P–1 | 19.8 9.6 8.5 96 93 94 |
| SIWFIN | Mn(II) | (I3)2 | P–1 | 9.4 8.6 24.5 94 96 92 |
| TERPCO | Co(II) | (SCN)2a.(H2O)2a | P–1 | 20.8 9.1 8.7 91 91 102 |
| TERPCO01 | Co(II) | (SCN)2.(H2O)2 | P–1 | 20.7 9.0 8.7 91 91 104 |
| ZUWPEM | Hg(II) | (F3CSO3)2a  (acetone)0.5 | P–1(z = 2) | 14.6 15.3 18.8 70 71 89 |
| NACPOW | Co(II) | (BPh4)2 nitrobenzene | Pbcn | 20.7 17.0 19.3 |
| ZIMBUS | Fe(II) | [(dipicolinato)2Fe(III)]2.  (CH3CN)3a.H2O | P21/n | 8.9 37.4 19.0 100 |
| TAQRUY | Mg(II) | [Mg(terpy)(H2O)3] (Br)4 iPrOH | P–1 | 19.4 12.9 11.5 111 99 99 |
| CAPRIU | Co(III) | (Cl)3a.(H2O)11 | P–1 | 9.0 11.8 18.1 91 91 91 |
| TERPCR | Cr(III) | (ClO4)3.H2O | Cc | 12.9 13.6 19.4 101 |

a Indicates some positional and/or orientational disorder

b CASXID is a low temperature study (120K) with cell a = b = 8.8, c = 19.3Å

c No coordinates available

**Table S2** Variables of the terpy layer motif.

| Refcode of example | Space group | Asymm Unit | M layer exact | Ligand planes perp. | Ligands perp. to layers | Adjacent layers rotated | Identical layer edges |
| --- | --- | --- | --- | --- | --- | --- | --- |
| CASXID | P42/n | ML1/2 | yes | yes | yes | no | yes |
| BEJPUB | P–421c | ML1/2 | yes | yes | yes | yes | yes |
| BIKJUA | P212121 | ML2 | yes | no | no | yes | no |
| CAPSAN | I41/a | M(L1/2)2 | no | no | yes | no | yes |
| DANMOU | P21 | ML2 | yes | no | no | yes | no |
| SIWFIN | P–1 | ML2 | yes | no | no | no | no |
